# Supplementary material for: Children drinking private well water have higher blood lead than those with city water
Source: PubMed Central journal article supplement — Proc Natl Acad Sci U S A. 2020 Jul 6;117(29):16898–907. doi: 10.1073/pnas.2002729117 (PMC7382258; doi:10.1073/pnas.2002729117), 2020-07-06
Supplement: pnas.2002729117.sapp.pdf [file pnas.2002729117.sapp.pdf]

**Supporting Information Appendix for**  
**Children Drinking Private Well Water Have Higher Blood Lead Than**  
**Those with City Water**

Jacqueline MacDonald Gibson, Michael Fisher, Allison Clonch, John M. MacDonald,  
Philip J. Cook  
Correspondence to: [jacmgibs@iu.edu](mailto:jacmgibs@iu.edu)

**This PDF file includes:**

- Figs. S1 to S2
- Tables S1 to S5
- Stata code for building and analyzing curated data set



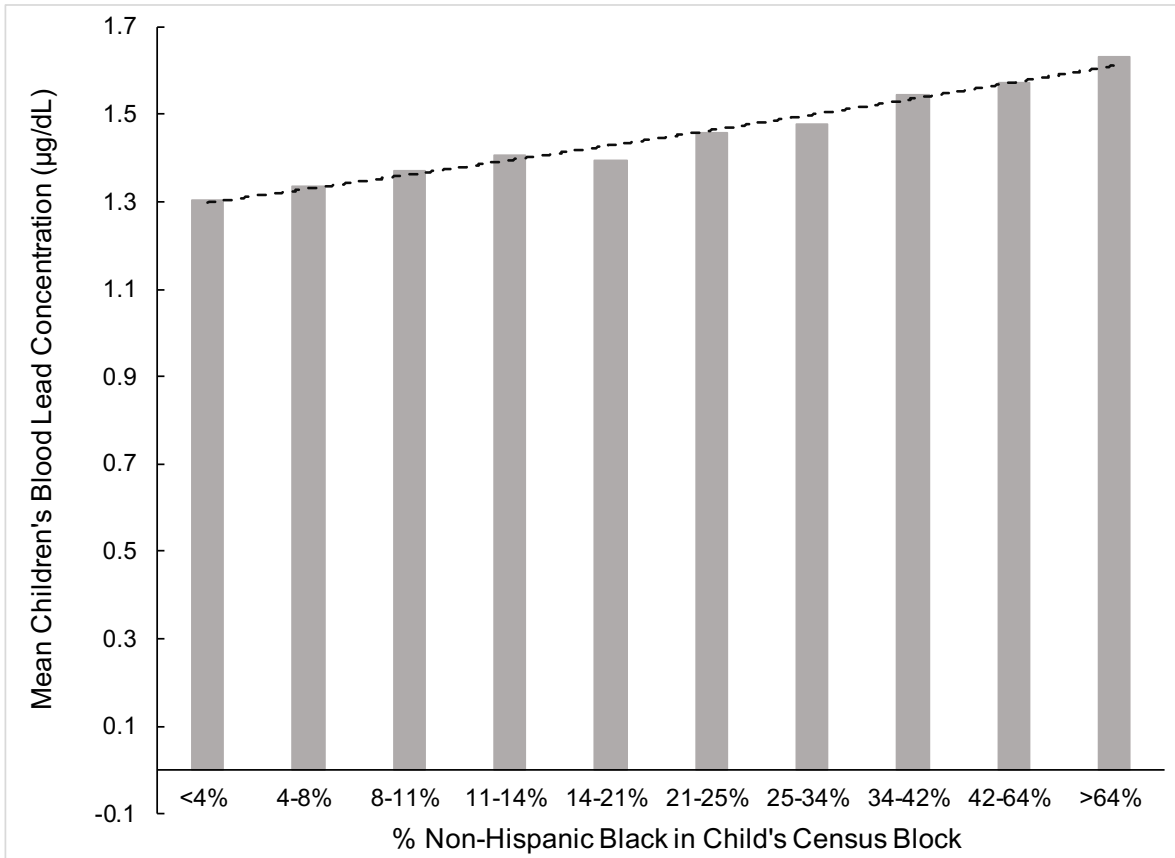

**Fig. S2.**  
 Blood lead concentration by % non-Hispanic black in the child's census block.

| Independent Variable                                           | Coefficient | Std. Err. | t      | p>t    | Lower 95% CI | Upper 95% CI |
|----------------------------------------------------------------|-------------|-----------|--------|--------|--------------|--------------|
| Water source (0=community water, 1=private well) (n=51,691)    | 0.0797      | 0.00619   | 12.9   | <0.001 | 0.0675       | 0.0918       |
| Male biological sex (n=58,330)                                 | 0.00656     | 0.00445   | 1.48   | 0.14   | -0.00215     | 0.0153       |
| Home value (natural log of total \$ value) (n=55,408)          | -0.141      | 0.00368   | -38.5  | <0.001 | -0.149       | -0.134       |
| Born in extraterritorial jurisdiction (0=no, 1=yes) (n=54,678) | 0.0977      | 0.00924   | 10.6   | <0.001 | 0.0800       | 0.116        |
| Blood draw year (natural log of years since 1990) (n=59,483)   | -1.058      | 0.00825   | -128   | <0.001 | -1.074       | -1.042       |
| Home area (sq. ft.) (n=59,483)                                 | -1.32E-07   | 8.67E-08  | -1.52  | 0.129  | -3.02E-07    | 3.85E-08     |
| Blood draw type (venous vs. capillary) (n=56,322)              | -0.012      | 0.00750   | -1.55  | 0.121  | -0.0263      | 0.00307      |
| African American population proportion (n=59,466)              | 0.316       | 0.0101    | 31.5   | <0.001 | 0.300        | 0.336        |
| Hispanic population proportion (n=59,466)                      | 0.500       | 0.0252    | 19.9   | <0.001 | 0.451        | 0.549        |
| Median income (natural log) (n=59,461)                         | -0.190      | 0.00508   | -37.3  | <0.001 | -0.200       | -0.180       |
| Age (months; reference category 0-8 months) (n=59,483)         |             |           |        |        |              |              |
| 9-14                                                           | -0.011      | 0.0245    | -0.45  | 0.652  | -0.0591      | 0.0369       |
| 15-19                                                          | 0.141       | 0.0258    | 5.46   | <0.001 | 0.0904       | 0.192        |
| 20-29                                                          | 0.061       | 0.0250    | 2.43   | 0.015  | 0.0117       | 0.110        |
| 30+                                                            | 0.180       | 0.0252    | 7.14   | <0.001 | 0.130        | 0.229        |
| Year house was built (ref. period: before 1950) (n=58,091)     |             |           |        |        |              |              |
| 1950-1977                                                      | -0.078      | 0.0102    | -7.68  | <0.001 | -0.0982      | -0.0583      |
| 1978-1987                                                      | -0.129      | 0.0108    | -12.0  | <0.001 | -0.150       | -0.108       |
| 1988-1997                                                      | -0.153      | 0.0104    | -14.7  | <0.001 | -0.174       | -0.133       |
| 1998-2002                                                      | -0.161      | 0.0104    | -15.5  | <0.001 | -0.182       | -0.141       |
| 2003-2007                                                      | -0.268      | 0.0104    | -25.9  | <0.001 | -0.289       | -0.248       |
| 2008-2017                                                      | -0.391      | 0.0119    | -32.7  | <0.001 | -0.414       | -0.367       |
|                                                                |             |           |        |        |              |              |
| Season (reference: winter)                                     |             |           |        |        |              |              |
| Spring                                                         | 0.00247     | 0.00447   | 0.393  | 0.694  | -0.00982     | 0.0148       |
| Summer                                                         | 0.0160      | 0.00616   | 2.59   | 0.010  | 0.00389      | 0.0280       |
| Fall                                                           | -0.00402    | 0.00635   | -0.634 | 0.526  | -0.0165      | 0.00842      |

**Table S1.**

Univariable ordinary least squares regressions of log blood lead versus selected independent variables. A test of the interactions between private well and year of construction was not statistically significant (Chi-square=3.46, df=6, p=0.748).

| Independent Variable                                                              | Exponentiated Coefficient | Std Err. | Z      | p>Z    | Lower 95% CI | Upper 95% CI |
|-----------------------------------------------------------------------------------|---------------------------|----------|--------|--------|--------------|--------------|
| Private well (reference category: community water supply)                         | 1.20                      | 0.0266   | 8.13   | <0.001 | 1.15         | 1.25         |
| Male biological sex                                                               | 1.05                      | 0.0119   | 3.83   | <0.001 | 1.02         | 1.07         |
| Home value (natural log of total \$)                                              | 0.77                      | 0.0150   | -13.3  | <0.001 | 0.745        | 0.804        |
| Born in extraterritorial jurisdiction (ETJ) (reference category: not born in ETJ) | 1.09                      | 0.0359   | 2.53   | 0.012  | 1.02         | 1.16         |
| Blood draw year-2002 (natural log)                                                | 0.0671                    | 0.00236  | -76.8  | <0.001 | 0.0626       | 0.0719       |
| Home area (sq. ft.)                                                               | 1.00                      | 1.16E-06 | 8.89   | <0.001 | 1.00         | 1.00         |
| Blood draw type (venous=0; capillary=1)                                           | 1.10                      | 0.0282   | 3.51   | <0.001 | 1.04         | 1.15         |
| African American population proportion                                            | 1.29                      | 0.0664   | 4.99   | <0.001 | 1.17         | 1.43         |
| Hispanic population proportion                                                    | 0.953                     | 0.108    | -0.470 | 0.670  | 0.762        | 1.19         |
| Median income (natural log)                                                       | 0.901                     | 0.0308   | -3.05  | 0.002  | 0.843        | 1.0          |
| Age (months; reference category 0-8 months)                                       |                           |          |        |        |              |              |
| 9-14                                                                              | 1.14                      | 0.0870   | 1.69   | 0.091  | 0.980        | 1.32         |
| 15-19                                                                             | 1.41                      | 0.112    | 4.27   | <0.001 | 1.20         | 1.64         |
| 20-29                                                                             | 1.36                      | 0.105    | 3.94   | <0.001 | 1.17         | 1.58         |
| 30+                                                                               | 1.35                      | 0.109    | 3.75   | <0.001 | 1.15         | 1.58         |
| Year home was built (reference period: before 1950)                               |                           |          |        |        |              |              |
| 1950-1977                                                                         | 0.780                     | 0.0333   | -5.85  | <0.001 | 0.717        | 0.848        |
| 1978-1987                                                                         | 0.691                     | 0.0303   | -8.38  | <0.001 | 0.634        | 0.753        |
| 1988-1997                                                                         | 0.658                     | 0.0289   | -9.52  | <0.001 | 0.604        | 0.717        |
| 1998-2002                                                                         | 0.618                     | 0.0278   | -10.7  | <0.001 | 0.566        | 0.675        |
| 2003-2007                                                                         | 0.653                     | 0.0298   | -9.36  | <0.001 | 0.597        | 0.714        |
| 2008 and later                                                                    | 0.619                     | 0.0361   | -8.24  | <0.001 | 0.552        | 0.694        |
| Season (reference: winter)                                                        |                           |          |        |        |              |              |
| Spring                                                                            | 0.985                     | 0.0173   | -0.880 | 0.380  | 0.951        | 1.02         |
| Summer                                                                            | 1.03                      | 0.0178   | 1.96   | 0.050  | 1.00         | 1.07         |
| Fall                                                                              | 0.976                     | 0.0186   | -1.27  | 0.204  | 0.940        | 1.01         |

**Table S2.**

Coefficients from mixed-effects Tobit regression model of log-transformed children's blood lead levels in Wake County NC (left-censored at log[1 ug/dL]). Coefficients are for a model including all variables shown ( $n=45,045$  complete observations). The model accounts clustering within households and census block groups.

| Independent Variable                                                              | Exponentiated Coefficient (Odds Ratio) | Std. Err. | Z       | p>Z    | Lower 95% CI | Upper 95% CI |
|-----------------------------------------------------------------------------------|----------------------------------------|-----------|---------|--------|--------------|--------------|
| Private well                                                                      | 1.25                                   | 0.105     | 2.68    | 0.007  | 1.06         | 1.48         |
| Male biological sex                                                               | 1.03                                   | 0.0687    | 0.450   | 0.654  | 0.904        | 1.17         |
| Home value (natural log of total \$ value)                                        | 0.619                                  | 0.0611    | -4.85   | <0.001 | 0.510        | 0.752        |
| Born in extraterritorial jurisdiction (ETJ) (reference category: not born in ETJ) | 1.22                                   | 0.146     | 1.68    | 0.092  | 0.968        | 1.55         |
| Blood draw year – 2002 (natural log)                                              | 0.0109                                 | 0.00204   | -24.1   | <0.001 | 0.00756      | 0.0157       |
| Home area (sq. ft.)                                                               | 1.00                                   | 4.75E-05  | -0.380  | 0.703  | 1.00         | 1.00         |
| Blood draw type (venous=0; capillary=1)                                           | 0.875                                  | 0.0881    | -1.32   | 0.186  | 0.719        | 1.07         |
| African American population proportion                                            | 0.905                                  | 0.171     | -0.530  | 0.596  | 0.624        | 1.31         |
| Hispanic population proportion                                                    | 0.375                                  | 0.191     | -1.92   | 0.05   | 0.138        | 1.02         |
| Median income (natural log)                                                       | 0.757                                  | 0.0929    | -2.27   | 0.023  | 0.595        | 0.963        |
|                                                                                   |                                        |           |         |        |              |              |
| Age (months; reference category 0-8 months)                                       |                                        |           |         |        |              |              |
| 9-14                                                                              | 0.658                                  | 0.206     | -1.34   | 0.180  | 0.357        | 1.21         |
| 15-19                                                                             | 1.15                                   | 0.373     | 0.420   | 0.672  | 0.607        | 2.17         |
| 20-29                                                                             | 0.927                                  | 0.306     | -0.230  | 0.818  | 0.486        | 1.77         |
| 30+                                                                               | 0.985                                  | 0.331     | -0.0400 | 0.965  | 0.510        | 1.90         |
|                                                                                   |                                        |           |         |        |              |              |
| Year home was built (reference year: 1950)                                        |                                        |           |         |        |              |              |
| 1950-1977                                                                         | 0.433                                  | 0.0578    | -6.27   | <0.001 | 0.333        | 0.563        |
| 1978-1987                                                                         | 0.421                                  | 0.0600    | -6.07   | <0.001 | 0.319        | 0.557        |
| 1988-1997                                                                         | 0.355                                  | 0.0513    | -7.16   | <0.001 | 0.268        | 0.472        |
| 1998-2002                                                                         | 0.329                                  | 0.0497    | -7.36   | <0.001 | 0.245        | 0.442        |
| 2003-2007                                                                         | 0.327                                  | 0.0522    | -7.00   | <0.001 | 0.239        | 0.447        |
| 2008 and later                                                                    | 0.650                                  | 0.152     | -1.85   | 0.065  | 0.412        | 1.03         |
|                                                                                   |                                        |           |         |        |              |              |
| Season (reference: winter)                                                        |                                        |           |         |        |              |              |
| Spring                                                                            | 1.00                                   | 0.0881    | 0.0100  | 0.991  | 0.842        | 1.19         |
| Summer                                                                            | 1.18                                   | 0.102     | 1.96    | 0.051  | 1.00         | 1.40         |
| Fall                                                                              | 1.10                                   | 0.107     | 0.940   | 0.345  | 0.905        | 1.33         |

**Table S3.**

Coefficients from mixed-effects logit regression estimating whether children’s blood lead levels equal or exceed the CDC action level of 5 µg/dL in Wake County, NC. Coefficients are for a model including all variables shown ( $n=45,266$  complete observations). The model accounts for clustering within households and census block groups.

| Independent Variable                                                              | Exponentiated Coefficient (Odds Ratio) | Std. Err. | Z      | p>Z    | Lower 95% CI | Upper 95% CI |
|-----------------------------------------------------------------------------------|----------------------------------------|-----------|--------|--------|--------------|--------------|
| Private well                                                                      | 1.47                                   | 0.0721    | 7.95   | <0.001 | 1.34         | 1.62         |
| Male biological sex                                                               | 1.10                                   | 0.0276    | 3.83   | <0.001 | 1.05         | 1.16         |
| Home value (natural log of total \$ value)                                        | 0.574                                  | 0.0240    | -13.3  | <0.001 | 0.529        | 0.623        |
| Born in extraterritorial jurisdiction (ETJ) (reference category: not born in ETJ) | 1.18                                   | 0.0829    | 2.34   | 0.019  | 1.03         | 1.35         |
| Blood draw year – 2002 (natural log)                                              | 0.00388                                | 0.000415  | -51.89 | <0.001 | 0.00314      | 0.00478      |
| Home area (sq. ft.)                                                               | 1.00                                   | 4.64E-06  | 5.17   | <0.001 | 1.00         | 1.00         |
| Blood draw type (venous=0; capillary=1)                                           | 1.32                                   | 0.0706    | 5.19   | <0.001 | 1.19         | 1.47         |
| African American population proportion                                            | 1.74                                   | 0.191     | 5.05   | <0.001 | 1.40         | 2.16         |
| Hispanic population proportion                                                    | 1.02                                   | 0.256     | 0.0800 | 0.934  | 0.625        | 1.67         |
| Median income (natural log)                                                       | 0.808                                  | 0.0590    | -2.92  | 0.004  | 0.700        | 0.932        |
|                                                                                   |                                        |           |        |        |              |              |
| Age (months; reference category 0-8 months)                                       |                                        |           |        |        |              |              |
| 9-14                                                                              | 1.44                                   | 0.224     | 2.33   | 0.020  | 1.06         | 1.95         |
| 15-19                                                                             | 2.20                                   | 0.361     | 4.79   | <0.001 | 1.59         | 3.03         |
| 20-29                                                                             | 2.08                                   | 0.331     | 4.58   | <0.001 | 1.52         | 2.84         |
| 30+                                                                               | 2.02                                   | 0.338     | 4.19   | <0.001 | 1.45         | 2.80         |
|                                                                                   |                                        |           |        |        |              |              |
| Year home was built (reference year: 1950)                                        |                                        |           |        |        |              |              |
| 1950-1977                                                                         | 0.623                                  | 0.0574    | -5.14  | <0.001 | 0.520        | 0.746        |
| 1978-1987                                                                         | 0.478                                  | 0.0450    | -7.83  | <0.001 | 0.398        | 0.575        |
| 1988-1997                                                                         | 0.430                                  | 0.0410    | -8.85  | <0.001 | 0.357        | 0.519        |
| 1998-2002                                                                         | 0.369                                  | 0.0360    | -10.2  | <0.001 | 0.305        | 0.447        |
| 2003-2007                                                                         | 0.426                                  | 0.0412    | -8.82  | <0.001 | 0.352        | 0.515        |
| 2008 and later                                                                    | 0.379                                  | 0.0450    | -8.17  | <0.001 | 0.301        | 0.479        |
|                                                                                   |                                        |           |        |        |              |              |
| Season (reference: winter)                                                        |                                        |           |        |        |              |              |
| Spring                                                                            | 0.952                                  | 0.0364    | -1.28  | 0.199  | 0.884        | 1.03         |
| Summer                                                                            | 1.06                                   | 0.0398    | 1.62   | 0.105  | 0.987        | 1.14         |
| Fall                                                                              | 0.934                                  | 0.0384    | -1.65  | 0.098  | 0.862        | 1.01         |

**Table S4.**

Coefficients from mixed-effects logit regression estimating whether children’s blood lead levels exceed the population median (1 µg/dL) in Wake County, NC. Coefficients are for a model including all variables shown ( $n=45,266$  complete observations). The model accounts for clustering within households and census block groups.

| Variable                       | Children in Homes with Private Wells (n=7,709) | Children in Homes Served by a Regulated Water Utility (n=43,982) |
|--------------------------------|------------------------------------------------|------------------------------------------------------------------|
| Age                            |                                                |                                                                  |
| < 9 months                     | 0.78%                                          | 0.85%                                                            |
| 9-14 months                    | 70.55%                                         | 70.59%                                                           |
| 15-19 months                   | 6.95%                                          | 6.50%                                                            |
| 20-29 months                   | 14.23%                                         | 14.30%                                                           |
| ≥30 months                     | 7.49%                                          | 7.77%                                                            |
| Biological sex                 |                                                |                                                                  |
| Female                         | 49.52%                                         | 49.24%                                                           |
| Male                           | 50.48%                                         | 50.76%                                                           |
| Year tested***                 |                                                |                                                                  |
| 2002-2006                      | 20.98%                                         | 18.55%                                                           |
| 2007-2012                      | 42.78%                                         | 44.79%                                                           |
| 2013-2017                      | 36.24%                                         | 36.66%                                                           |
| Year house was built***        |                                                |                                                                  |
| Before 1950                    | 4.80%                                          | 5.95%                                                            |
| 1950-1978                      | 23.29%                                         | 20.80%                                                           |
| 1978-1988                      | 16.05%                                         | 14.74%                                                           |
| 1988-1998                      | 18.07%                                         | 15.87%                                                           |
| 1998-2003                      | 13.53%                                         | 18.04%                                                           |
| 2003-2008                      | 15.26%                                         | 18.54%                                                           |
| 2008 or later                  | 9.00%                                          | 6.06%                                                            |
| Home value***                  |                                                |                                                                  |
| Quartile 1 (<\$132,880)        | 31.82%                                         | 23.78%                                                           |
| Quartile 2 (\$132,881-188,281) | 23.69%                                         | 25.68%                                                           |
| Quartile 3 (\$188,282-292,135) | 20.62%                                         | 25.88%                                                           |
| Quartile 4 (>\$292,135)        | 23.87%                                         | 24.65%                                                           |
| Black population proportion*** |                                                |                                                                  |
| Quartile 1 (<0.095)            | 28.09%                                         | 25.16%                                                           |
| Quartile 2 (.095-0.211)        | 28.12%                                         | 24.42%                                                           |
| Quartile 3 (0.212-0.370)       | 27.10%                                         | 24.29%                                                           |
| Quartile 4 (>0.370)            | 16.69%                                         | 26.12%                                                           |
| Median income***               |                                                |                                                                  |
| Quartile 1 (<\$49,012)         | 15.37%                                         | 26.39%                                                           |
| Quartile 2 (\$49,012-62,925)   | 27.03%                                         | 24.88%                                                           |
| Quartile 3 (\$62,926-83,985)   | 33.70%                                         | 23.47%                                                           |
| Quartile 4 (>\$83,985)         | 23.90%                                         | 25.27%                                                           |



| <b>Variable</b>                                                                                                                                      | <b>Children in Homes with Private Wells (n=7,709)</b> | <b>Children in Homes Served by a Regulated Water Utility (n=43,982)</b> |
|------------------------------------------------------------------------------------------------------------------------------------------------------|-------------------------------------------------------|-------------------------------------------------------------------------|
| Blood draw type                                                                                                                                      |                                                       |                                                                         |
| <i>Capillary</i>                                                                                                                                     | 9.10%                                                 | 9.66%                                                                   |
| <i>Venous</i>                                                                                                                                        | 90.90%                                                | 90.34%                                                                  |
| Season                                                                                                                                               |                                                       |                                                                         |
| <i>Winter</i>                                                                                                                                        | 22.92%                                                | 23.05%                                                                  |
| <i>Spring</i>                                                                                                                                        | 25.48%                                                | 25.22%                                                                  |
| <i>Summer</i>                                                                                                                                        | 25.85%                                                | 25.84%                                                                  |
| <i>Fall</i>                                                                                                                                          | 25.75%                                                | 25.90%                                                                  |
| ***Distributions between children with private wells and those with city water differs significantly, $p < 0.001$ , as measured by chi-square tests. |                                                       |                                                                         |

**Table S5.**

Distributions of covariates used in regressions by water source.

## Stata Code

### Code for Merging Blood Lead and Property Parcel Tax Data

\*Concat two address strings

```
gen address_c=siteaddr  
replace address_c=siteaddress if missing(siteaddr)
```

```
gen zipcode=.  
replace zipcode=zipnum  
gen cityr = citydecode
```

```
gen cityr2= cityr  
replace cityr2 = "Angier" if cityr=="ANG" | cityr=="ANGIER"  
replace cityr2 = "Apex" if cityr=="APE" | cityr=="APEX"  
replace cityr2 = "Cary" if cityr=="CAR" | cityr=="CARY"  
replace cityr2 = "Durham" if cityr=="DUR" | cityr=="DURHAM"  
replace cityr2 = "Garner" if cityr=="GAR" | cityr=="GARNER"  
replace cityr2 = "Holly Springs" if cityr=="HOL" | cityr=="HOLLY SPRINGS"  
replace cityr2 = "Knightdale" if cityr=="KNI" | cityr=="KNIGHTDALE" |  
cityr=="KKNIGHTDALE" | cityr=="KNIGHTDAL" | cityr=="KNIGHTDALEE"  
replace cityr2 = "Morrisville" if cityr=="MOR" | cityr=="MORRISVILLE" |  
cityr=="ORRISVILLE" | cityr=="MARRISVILLE" | cityr=="MIRRISVILLE" |  
cityr=="MOORESVILLE" | cityr=="MOORISVILLE" | cityr=="MOORRISVILLE" |  
cityr=="MORISSVILLE" | cityr=="MORISVILLE" | cityr=="MORRISIVLLE" |  
cityr=="MORRISVILLEA" | cityr=="MORRISVLLLE" | cityr=="MORRIVILLE" |  
cityr=="MORRRISVILLE" | cityr=="MORRSIVILLE" | cityr=="MORRSVILLE"  
replace cityr2 = "Raleigh" if cityr=="RAL" | cityr=="RALEIGH" | cityr=="RAELIGH" |  
cityr=="RALEIGHJ" | cityr=="RALEIGHT" | cityr=="RALIEGH" | cityr=="RALIGH" |  
cityr=="ROAEIGH" | cityr=="WALEIGH"  
replace cityr2 = "Rolesville" if cityr=="ROL" | cityr=="ROLESVILLE" |  
cityr=="ROLESVILLES"  
replace cityr2 = "Wake Forest" if cityr=="WAK" | cityr=="WAKE FOREST" |  
cityr=="WAKWE FOREST"  
replace cityr2 = "Wendell" if cityr=="WEN" | cityr=="WENDELL"  
replace cityr2 = "Willow Springs" if cityr=="WILLOW SPRING" |  
cityr=="WILLOWSPRINGS" | cityr=="WILLOW SPRINGS" | cityr=="Willowsprings" |  
cityr=="Willow Spring"  
replace cityr2 = "Zebulon" if cityr=="ZEB" | cityr=="ZEBULON"  
replace cityr2 = "Fuquay-Varina" if cityr=="FUQUAY VARINA" |  
cityr=="FUQUAYVARINA" | cityr=="FUQ" | cityr=="FUQUAY VARINA" | cityr=="Fuquay  
Varina" | cityr=="FUQUAY-VARINA"  
replace cityr2 = "Clayton" if cityr=="CLAYTON" | cityr=="CLAY" | cityr=="Clay"  
tab cityr2
```

```
nysiis cityr2, generate(cityr2_nysiis)
```

```
*Drop the missing addresses
drop if missing(address_c)
gsort address_c township -year
```

```
*Drop the duplicates addresses that have the same township
by address_c township, sort: gen seq=_n
keep if seq==1
```

```
capture drop dup
duplicates t address_c , gen(dup)
tab dup
order address_c
```

```
*Deleted potentially valid addresses with duplicate street, but different township
by address_c, sort: keep if _n==_N
gen idfm=_n
```

```
capture drop multiunit
gen multiunit=(land_class2018=="APT" | land_class2018=="COX" | totvalassd>10000000 |
structure>1199)
replace multiunit=. if missing(land_class2018) | totvalassd==. | structure==.
```

```
*Create a first word of each address
capture drop address_part*
gen address_part1=substr(address_c,1,strpos(address_c," "))
gen address_part3=substr(address_c,strrpos(address_c," "),.)
gen address_part2=substr(address_c,strpos(address_c," "),length(address_c)-
length(address_part1)-length(address_part3)+1)
```

```
gen address_part3_r = address_part3
replace address_part3_r = "CIRCLE" if address_part3=="CIR"
replace address_part3_r = "CROSSING" if address_part3=="CROSS" | address_part3=="CRSG"
replace address_part3_r = "DRIVE" if address_part3=="DR"
replace address_part3_r = "LANE" if address_part3=="LN"
replace address_part3_r = "STREET" if address_part3=="ST"
replace address_part3_r = "ROAD" if address_part3=="RD"
replace address_part3_r = "TERRACE" if address_part3=="TER"
replace address_part3_r = "GREEN" if address_part3=="GRN"
tab address_part3_r
```

```
nysiis address_part2, generate(address_part2_nysiis)
```

```
*Gen address parcel for comparison
gen address_c_parcel = address_c
```

```
address_part2_nysiis cityr_nysiis
```

```
drop if missing(address_c)
save "C:\Users\fishermb\Desktop\temp\final_merged_c2_v4", replace
```

```
clear
```

```
*Next steps involved importing county tax parcel data
```

```
*reshape wide date
```

```
gen address_c=" "
replace address_c = street1
drop if missing(address_c)
```

```
*first part of address
```

```
gen address_part1=substr(address_c,1,strpos(address_c," "))
```

```
*second part of address
```

```
gen address_part3=substr(address_c,strrpos(address_c," "),.)
```

```
*Middle part of address
```

```
gen address_part2=substr(address_c,strpos(address_c," "),length(address_c)-
length(address_part1)-length(address_part3)+1)
```

```
gen address_part3_r = address_part3
```

```
replace address_part3_r = "CIRCLE" if address_part3=="CIR"
```

```
replace address_part3_r = "CROSSING" if address_part3=="CROSS" | address_part3=="CRSG"
```

```
replace address_part3_r = "DRIVE" if address_part3=="DR"
```

```
replace address_part3_r = "LANE" if address_part3=="LN"
```

```
replace address_part3_r = "STREET" if address_part3=="ST"
```

```
replace address_part3_r = "ROAD" if address_part3=="RD"
```

```
replace address_part3_r = "TERRACE" if address_part3=="TER"
```

```
replace address_part3_r = "GREEN" if address_part3=="GRN"
```

```
tab address_part3_r
```

```
nysiis address_part2, generate(address_part2_nysiis)
```

```
gen cityr = city
```

```
gen cityr2= cityr
```

```
replace cityr2 = "Angier" if cityr=="ANG" | cityr=="ANGIER"
```

```
replace cityr2 = "Apex" if cityr=="APE" | cityr=="APEX"
```

```
replace cityr2 = "Cary" if cityr=="CAR" | cityr=="CARY"
```

```
replace cityr2 = "Durham" if cityr=="DUR" | cityr=="DURHAM"
```

```
replace cityr2 = "Garner" if cityr=="GAR" | cityr=="GARNER"
```

```
replace cityr2 = "Holly Springs" if cityr=="HOL" | cityr=="HOLLY SPRINGS"
```

```
replace cityr2 = "Knightdale" if cityr=="KNI" | cityr=="KNIGHTDALE" |
```

```
cityr=="KKNIGHTDALE" | cityr=="KNIGHTDAL" | cityr=="KNIGHTDALEE"
```

```

replace cityr2 = "Morrisville" if cityr=="MOR" | cityr=="MORRISVILLE" |
cityr=="ORRISVILLE" | cityr=="MARRISVILLE" | cityr=="MIRRISVILLE" |
cityr=="MOORESVILLE" | cityr=="MOORISVILLE" | cityr=="MOORRISVILLE" |
cityr=="MORISSVILLE" | cityr=="MORISVILLE" | cityr=="MORRISIVLLE" |
cityr=="MORRISVILLEA" | cityr=="MORRISVLLLE" | cityr=="MORRIVILLE" |
cityr=="MORRRISVILLE" | cityr=="MORRSIVILLE" | cityr=="MORRSVILLE"
replace cityr2 = "Raleigh" if cityr=="RAL" | cityr=="RALEIGH" | cityr=="RAELIGH" |
cityr=="RALEIGHJ" | cityr=="RALEIGHT" | cityr=="RALIEGH" | cityr=="RALIGH" |
cityr=="ROAEIGH" | cityr=="WALEIGH"
replace cityr2 = "Rolesville" if cityr=="ROL" | cityr=="ROLESVILLE" |
cityr=="ROLESVILLES"
replace cityr2 = "Wake Forest" if cityr=="WAK" | cityr=="WAKE FOREST" |
cityr=="WAKWE FOREST"
replace cityr2 = "Wendell" if cityr=="WEN" | cityr=="WENDELL"
replace cityr2 = "Willow Springs" if cityr=="WILLOW SPRING" |
cityr=="WILLOWSPRINGS" | cityr=="WILLOW SPRINGS" | cityr=="Willowsprings" |
cityr=="Willow Spring"
replace cityr2 = "Zebulon" if cityr=="ZEB" | cityr=="ZEBULON"
replace cityr2 = "Fuquay-Varina" if cityr=="FUQUAY VARINA" |
cityr=="FUQUAYVARINA" | cityr=="FUQ" | cityr=="FUQUAY VARINA" | cityr=="Fuquay
Varina" | cityr=="FUQUAY-VARINA"
replace cityr2 = "Clayton" if cityr=="CLAYTON" | cityr=="CLAY" | cityr=="Clay"
tab cityr2

```

```
nysiis cityr2, generate(cityr2_nysiis)
```

```
gen zipcode = zip
```

```
*Gen address DPH for comparison
```

```
gen address_c_DPH = address_c
```

```
dtalink address_c 20 -1 cityr2 1 -5 cityr2_nysiis 1 -7 address_part1 2 -20 address_part2 10 -2
```

```
address_part3_r 5 -2 address_part2_nysiis 5 -5 zipcode 1 -5 ///
```

```
using "C:\Users\fisherm\\Desktop\temp\final_merged_c2_v4.dta", cutoff(7) bestmatch describe
examples(25) block(zipcode)
```

```
drop if _matchflag!=1
```

```
ds _matchID, not
```

```
collapse (lastnm) `r(varlist)', by(_matchID)
```

## Data Analysis Code

\*Recode some of the variables

```
gen tapyear=test_year-2001
gen medhouseholdincome_r = medhouseholdincome/10000
gen home_value_r = home_value/100000
gen well_water = .
replace well_water = private_well
```

\*Mixed-effects Tobit regression model predicting log(BLL)

```
metobit log_lead i.private_well gender_bin ///
  log_home_value born_in_etj log_test_year home_area_sqft blood_draw_type proportion_black
  proportion_hispanic logincome ///
  i.age_months_cat i.year_of_construction i.season || match_addr:, ll(0) vce(cluster block_group)
```

\*Logit regression predicting odds of BLL > 5 µg/dL

```
xtlogit actionlevel private_well gender_bin ///
  log_home_value born_in_etj log_test_year home_area_sqft blood_draw_type proportion_black
  proportion_hispanic logincome ///
  i.age_months_cat i.year_of_construction i.season, re i (match) vce(cluster block_group) or
```

\*Logit regression predicting odds of BLL above population median

```
xtlogit bll_binary_2ugdl private_well gender_bin ///
  log_home_value born_in_etj log_test_year home_area_sqft blood_draw_type proportion_black
  proportion_hispanic logincome ///
  i.age_months_cat i.year_of_construction i.season, re i (match) vce(cluster block_group) or
```
